# Supplementary material
Source: PubMed Central journal article supplement (PMC2567517)

# Supporting Information

Almeida *et al.* 10.1073/pnas.0805867105

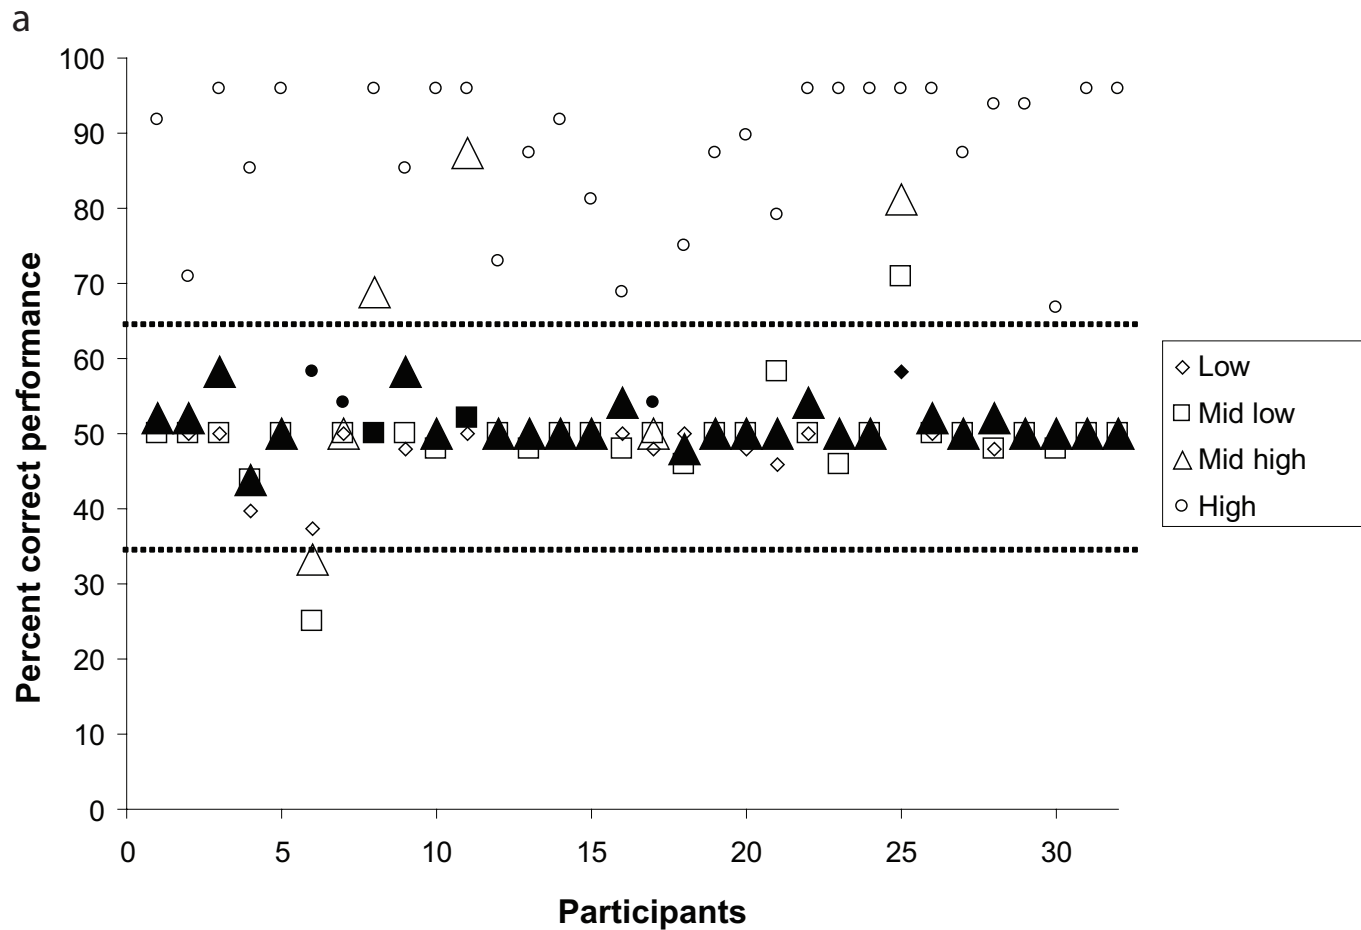

Fig. S1a.

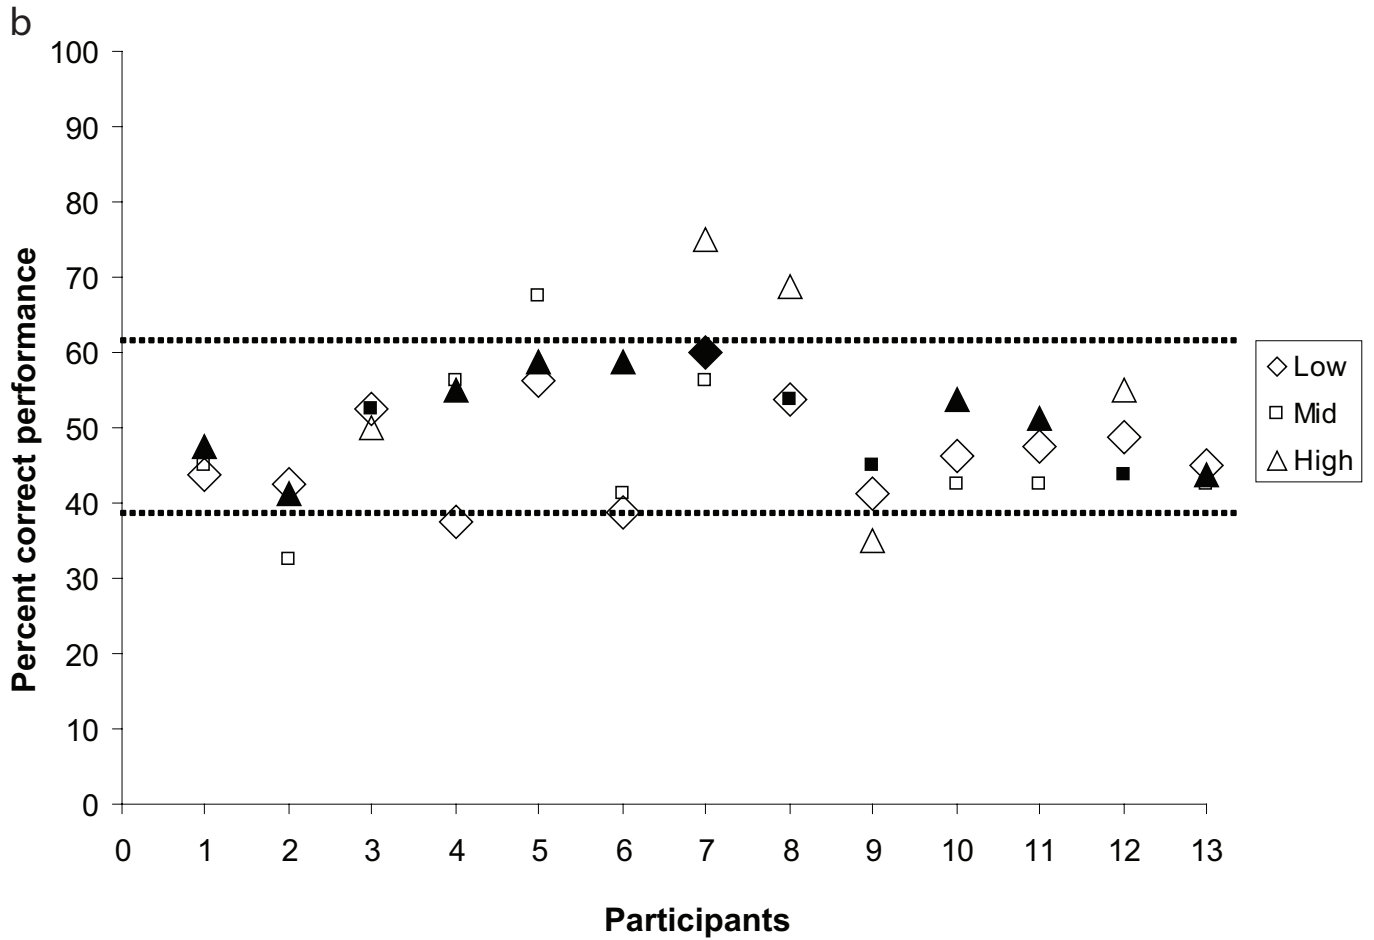

Fig. S1b.

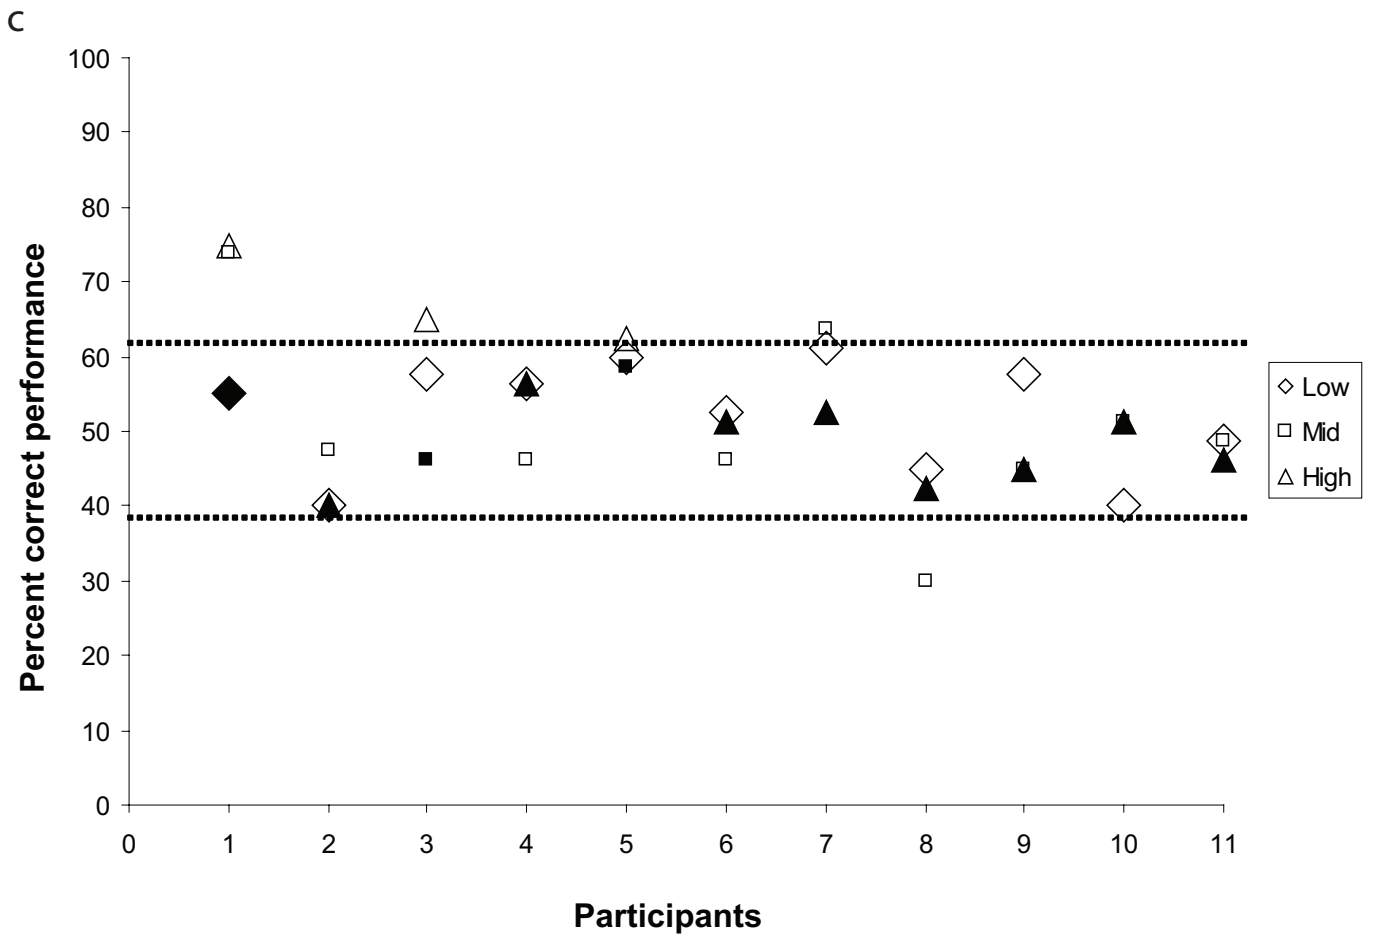

Fig. S1c.



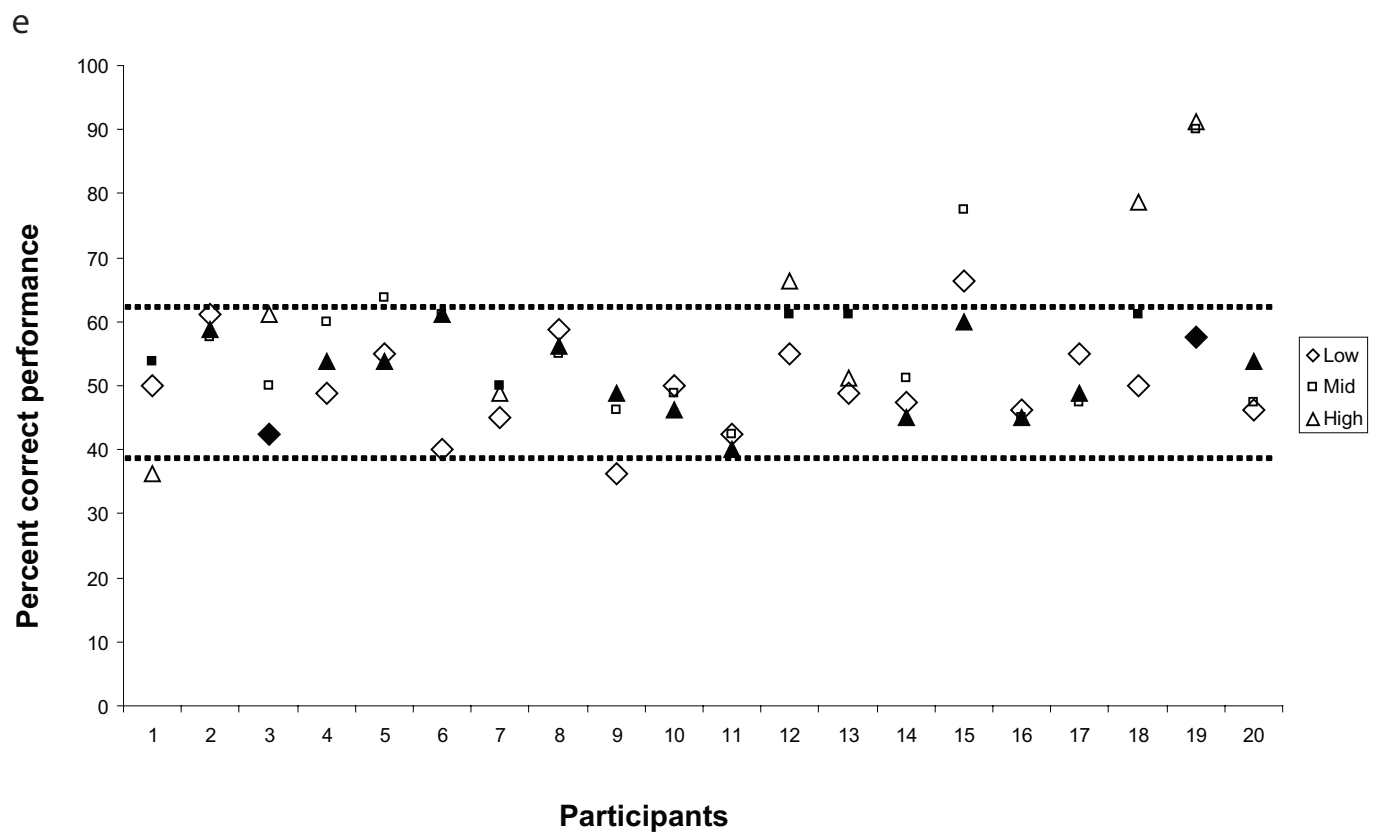

Fig. S1e.

Supplement: 0805867105_0805867105SI.pdf [file 0805867105_0805867105SI.pdf]
